# Supplementary material
Source: publisher figshare collection journal article supplement (https://acs.figshare.com/ndownloader/files/3753451)
Supplement: Supplementary file 1 [file 3753451]

## Supporting Information

### Quantitative Silylation Speciations of Primary Phenylalkyl Amines, Including Amphetamine and 3,4-Methylenedioxyamphetamine Prior to Their Analysis by GC/MS

Borbála Molnár<sup>†, &</sup>, Blanka Fodor<sup>†</sup>, Imre Boldizsár<sup>‡</sup>, Ibolya Molnár-Perl<sup>†\*</sup>

*Institutes of Chemistry<sup>†</sup> and Biology<sup>‡</sup>, Departments of Analytical Chemistry<sup>†</sup> and Plant Anatomy<sup>‡</sup>, L. Eötvös University, 1117, Pázmány Péter sétány 1/A-C, Budapest, Hungary; Doctoral School of Pharmaceutical Sciences<sup>&</sup>, Semmelweis University, 1085, Üllői út 26, Budapest, Hungary*

## TABLE OF CONTENTS

|                                                                                                                                                            |     |
|------------------------------------------------------------------------------------------------------------------------------------------------------------|-----|
| <b>The source and preparation background of the amphetamine ditrimethylsilyl (A-diTMS) spectrum in the NIST data basis</b> .....                           | S-2 |
| The A-diTMS spectrum's source.....                                                                                                                         | S-2 |
| The preparation background of the A-diTMS derivative.....                                                                                                  | S-2 |
| <b>Sample preparation for derivatization prior to their GC-MS analysis</b> .....                                                                           | S-3 |
| Ultrasound assisted solvent extraction followed by centrifugation of the freeze dried cactus ( <i>Lophophora Williamsii</i> , Lem.).....                   | S-3 |
| Liquid/liquid extraction of urine .....                                                                                                                    | S-3 |
| <b>Figure S1.</b> Peak profiles and mass spectra of the monoTMS derivatives of PPAAAs, including A and MDA.....                                            | S-4 |
| <b>Figure S2.</b> Peak profile and mass spectra of acylated A and MDA derivatives obtained with the HMDS &TFA couple .....                                 | S-5 |
| <b>Figure S3.</b> Mass spectra of acylated (1A, 1B) and ditrimethylsilylated (2A, 2B) A, obtained from urine (1A, 2A) or standard (1B, 2B) samples.....    | S-6 |
| <b>Figure S4.</b> Mass spectra of acylated (1A, 1B) and ditrimethylsilylated (2A, 2B) MSC, obtained from cactus (1A, 2A) or standard (1B, 2B) samples..... | S-7 |
| <b>References</b> .....                                                                                                                                    | S-8 |

## The source and preparation background of the amphetamine ditrimethylsilyl (A-diTMS) spectrum in the NIST data basis

### The A-diTMS spectrum's source

Coming back to the statement in the manuscript, here we gave details on the source of A-diTMS spectrum, found in the NIST library.

This spectrum was taken from the list of a separate spectrum library, authored by Peter Rösner, entitled "Mass spectra of designer drugs"<sup>S1</sup>

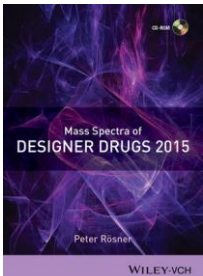

**Name:**  
Amphetamine 2TMS  
1,1,1-Trimethyl-N-(1-methyl-2-phenylethyl)-N-(trimethylsilyl)silanamine

**InChI:**  
InChI=1S/C15H29NSi2/c1-14(13-15-11-9-8-10-12-15)16(17(2,3)4)18(5,6)7/h8-12,14H,13H2,1-7H3

[Return to compound list](#)

### The preparation background of the A-diTMS derivative<sup>S2</sup>

E-mail, on corresponding author's request

From: i.molnar.perl@gmail.com  
To: info@chemograph.de  
Date: April 4, 2015 at 9:33 AM  
Subject: request for analytical conditions

Dear Colleagues,

Undersigned I would be happy to know, the experimental conditions providing amphetamine-2TMS (reagent, solvent, catalyst, reaction time, temperature).

Many thanks in advance, kind regards,  
ibolya molnár-perl

E-mail, with the answer

From: Steven.Luhn@bka.bund.de  
To: i.molnar.perl@gmail.com  
Cc: p.roesner@t-online.de  
Date: April 7, 2015 at 9:04 AM  
Subject: AW: request for analytical conditions

Good morning Dr. Molnar,

Dr. Roesner instructed me to give you a guide for the silylation of amphetamin.

GC-Conditions: Inlet Temp-250°C->Start Temp. 70°C->Ramp up at 10°C/min-> 300°C->5min. hold  
Transfer-line 250°C; Column DB-1 or DB-5 for best results

Silylation with MSTFA (N-Methyl-N-(trimethylsilyl)trifluoroacetamide) and Pyridin as catalyst.

Your GC-MS-System must be conditioned by 3-5 injections with a mixture of CHCl<sub>3</sub>/MSTFA(3:1).

Your amphetamine-sample should be dry.->At a normal amphet.-sample use 0,1-0,5mg of your sample->mix it with 100µl MSTFA and 10µl Pyridin->store it for 10-to 15 min in a 70°C hot sand bath or another hot place and afterwards put it in a clean microvial->do not use another solvent->inject the mixture.

The amphetamine-TMS elutes after 7-10 min (big Peak, RI: 1566) and the amphetamin-TMS2(small Peak) 3-6 min later. Maybe you have to inject the solution for some more times to get good results.

For more questions write me an e-mail.

Good luck,

Greetings from Germany.

Steven Luhn

## **Sample preparation for derivatization prior to their GC-MS analysis**

### **Ultrasound assisted solvent extraction followed by centrifugation of the freeze dried cactus (*Lophophora Williamsii*, Lem.)**

0.002 g freeze dried cactus tissues, weighed with  $\pm 0.001$  mg uncertainty, were subjected to ultrasound assisted extraction with 2 mL methanol containing 10% hydrochloric acid, w/w (further on: methanol/HCl). Reactions were performed at 60 °C for 30 min, applying a reflux condenser. After centrifugation, solvent was quantitatively transferred to a 5 mL volumetric flask. The residue was extracted, centrifuged, then the solvent layer transferred again, 3 times, as before. Stock solution volume was completed to 5.0 mL, its aliquots (5  $\mu$ L, 10  $\mu$ L, 25  $\mu$ L and 50  $\mu$ L) were evaporated to dryness at 30 - 40 °C and derivatized.

### **Liquid/liquid extraction of urine**

1 mL urine pipetted into a shaking funnel, was treated with 20  $\mu$ L sodium hydroxide (10% w/v) and extracted with 1 mL dichloromethane. Subsequently the phases separation, solvent was transferred through a cartridge - covered with anhydrous sodium sulfate – into a 5 mL volumetric flask, containing 50  $\mu$ L methanol/HCl. The entire procedure was repeated 3 times more. Stock solution volume was completed to 5.0 mL, its aliquots (250  $\mu$ L, 500  $\mu$ L) were evaporated to dryness at 30-40 °C and derivatized.

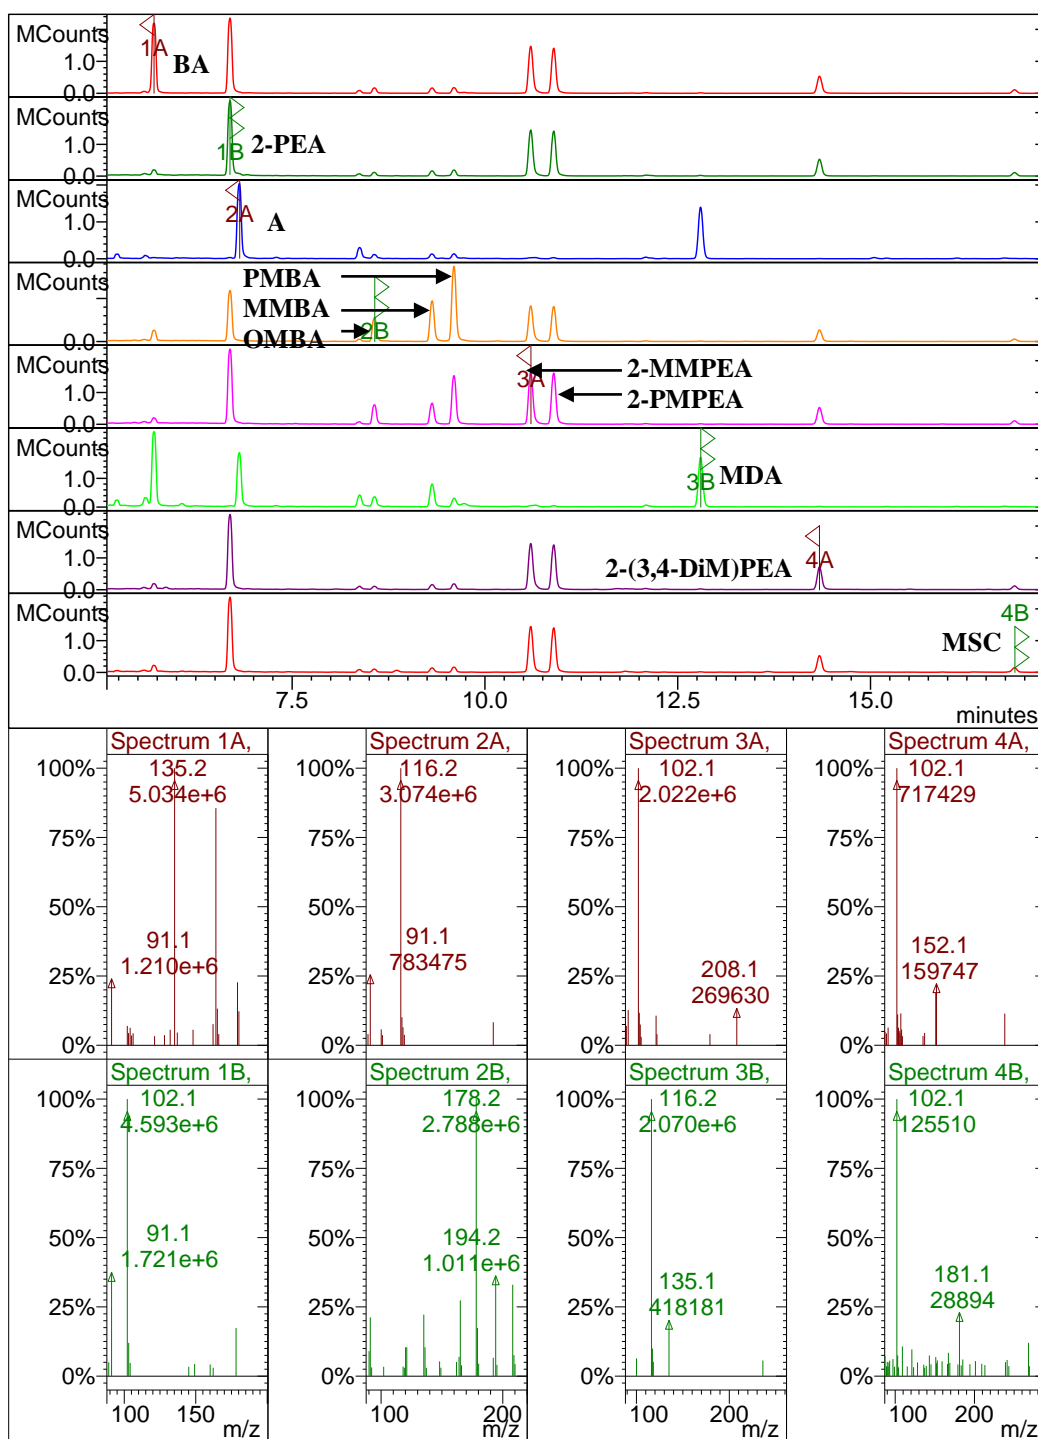

**Figure S1.**  
Peak profiles and mass spectra of the monoTMS derivatives of PPAAs, including A and MDA

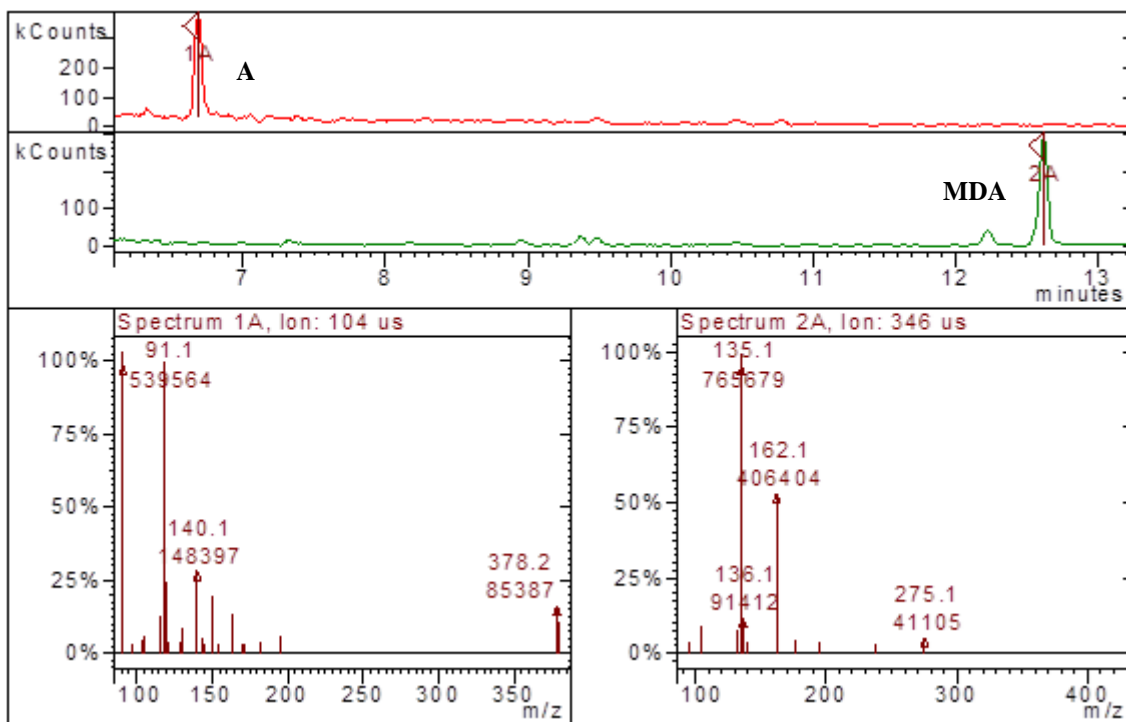

**Figure S2.**

Peak profile and mass spectra of acylated A and MDA derivatives obtained with the HMDS & TFA couple.<sup>S3</sup>

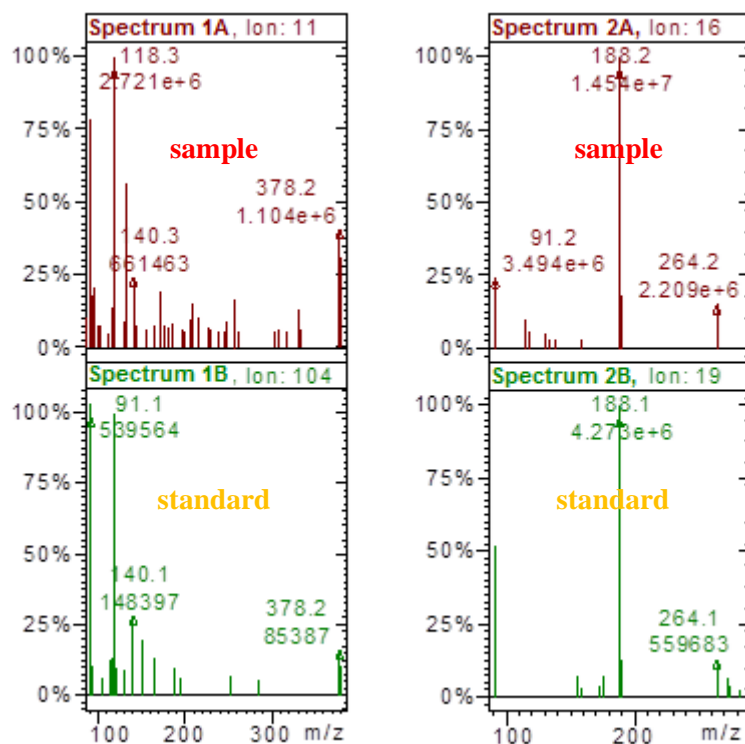

**Figure S3.**

Mass spectra of acylated (1A, 1B) and ditrimethylsilylated (2A, 2B) A, obtained from urine (1A, 2A) or standard (1B, 2B) samples

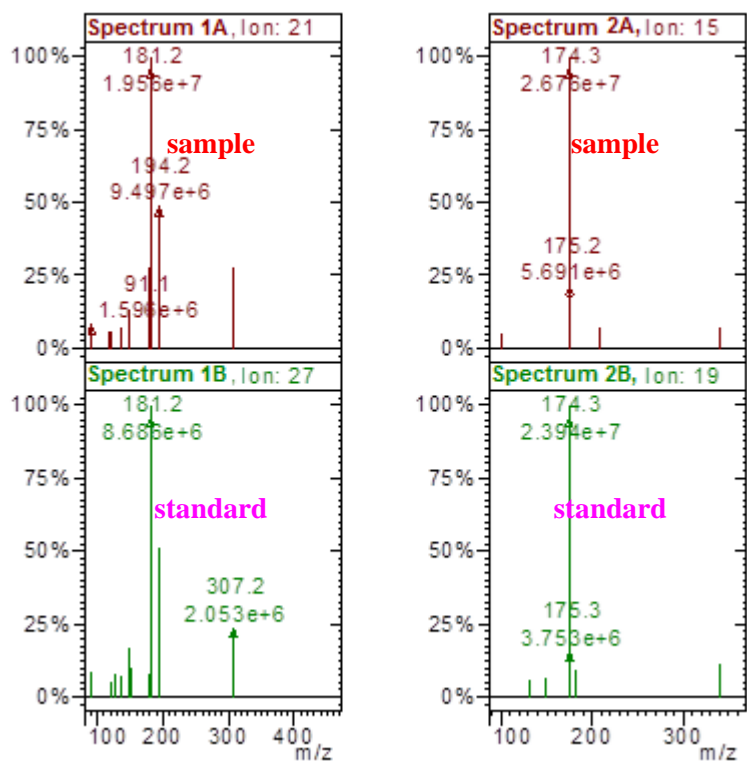

**Figure S4.** Mass spectra of acylated (1A, 1B) and ditrimethylsilylated (2A, 2B) MSC, obtained from cactus (1A, 2A) or standard (1B, 2B) samples

## References

- <sup>S1</sup> Rösner, P. *Mass Spectra of Designer Drugs* [CD-ROM]; Wiley-VCH: Weinheim, 2015.
- <sup>S2</sup> Rösner, P. University of Kiel, Kiel, Germany. Personal communication, 2015.
- <sup>S3</sup> Molnár, B.; Csámpai, A.; Molnár-Perl, I. *Anal. Chem.* **2015**, 87, 848-852.
